# Supplementary material for: Selective Internal Radiation Therapy (SIRT) with yttrium-90 resin microspheres plus standard systemic chemotherapy regimen of FOLFOX versus FOLFOX alone as first-line treatment of non-resectable liver metastases from colorectal cancer: the SIRFLOX study
Source: PubMed Central journal article supplement (PMC4289171; doi:10.1186/1471-2407-14-897), 2014-12-01
Supplement: 12885_2014_5083_MOESM1_ESM.pdf [file 12885_2014_5083_MOESM1_ESM.pdf]

| <b>Participating centre</b>                                                                                                                                                                                                                                                                                                                                                                                                                                                                                                                                                                                                                                                                                                                                                                                                                                                                                  | <b>Ethics committee</b>                                                            | <b>Ethics committee town/city and country</b> |
|--------------------------------------------------------------------------------------------------------------------------------------------------------------------------------------------------------------------------------------------------------------------------------------------------------------------------------------------------------------------------------------------------------------------------------------------------------------------------------------------------------------------------------------------------------------------------------------------------------------------------------------------------------------------------------------------------------------------------------------------------------------------------------------------------------------------------------------------------------------------------------------------------------------|------------------------------------------------------------------------------------|-----------------------------------------------|
| <p>Philipps-Universität Marburg<br/>Tagesklinik Hamatologie Onkologie Landshut<br/>Hämato-onkologische Gemeinschaftspraxis und Tagesklinik<br/>Krebszentrum Ratingen<br/>PraxisKooperation Bonn – Euskirchen – Rheinbach<br/>Klinikum rechts der Isar der TU München<br/>Universitätsklinikum des Saarlandes<br/>Klinikum Magdeburg gGmbH<br/>Schwerpunktpraxis für Hämatologie und Onkologie Magdeburg<br/>MVZ Ingolstadt, Onkologische Praxis Dr Gehbauer/Dr Maywald<br/>Klinikum der Universität München<br/>Universitätsklinik Bonn<br/>Universitätsklinikum Magdeburg<br/>Städtisches Klinikum München GmbH<br/>Evangelische Kliniken Bonn GmbH, Johanniterkrankenhaus Bonn<br/>Klinikum der Johann Wolfgang Goethe - Universität Frankfurt am Main<br/>Klinikum Karlsruhe, Städtisches Klinikum Karlsruhe gGmbH<br/>Kliniken Essen Mitte<br/>Charite Berlin<br/>Vivantes Klinikum am Urban, Berlin</p> | <p>Ethics Committee of the Medical Faculty of the University of Munich</p>         | <p>Munich, Germany</p>                        |
| <p>Hopital Europeen Georges Pompidou<br/>Centre Eugene Marquis<br/>Hopital de l'Archet II, CHU de Nice<br/>CHU de Bordeaux<br/>CHU de Grenoble &amp; University Hospital Albert Michallon<br/>Centre Hospitalier General de Longjumeau</p>                                                                                                                                                                                                                                                                                                                                                                                                                                                                                                                                                                                                                                                                   | <p>Laboratory of Medical Ethics and Legal Medicine, University Paris Descartes</p> | <p>Paris, France</p>                          |

| <b>Participating centre</b>                                                                                                                                                                                                                                                       | <b>Ethics committee</b>                                                               | <b>Ethics committee town/city and country</b> |
|-----------------------------------------------------------------------------------------------------------------------------------------------------------------------------------------------------------------------------------------------------------------------------------|---------------------------------------------------------------------------------------|-----------------------------------------------|
| Institut Jules Bordet<br>Universiteit Ziekenhuis Gent<br>Universiteit Ziekenhuis Leuven<br>Antwerp University Hospital<br>CHU Sart Tilman<br>AZ Maria Middelaes<br>OL Vrouw Ziekenhuis Aalst<br>Hopital de Jolimont<br>Imelda Ziekenhuis<br>AZ Heilige Familie<br>AZ Sint-Maarten | Ethics Committee                                                                      | Gent, Belgium                                 |
| University Hospital of Bologna<br>Policlinico S. Orsola Malpighi                                                                                                                                                                                                                  | Independent<br>Ethics Committee<br>of the University<br>Hospital<br>Policlinico S     | Bologna, Italy                                |
| Clinica Universitaria de Navarra<br>Hospital de Navarra                                                                                                                                                                                                                           | Ethics Committee<br>for Clinical<br>Research of<br>Navarra<br>Department of<br>Health | Pamplona, Spain                               |
| Wojskowy Instytut Medyczny<br><br><i>(Site in Poland initiated but never recruited any patients)</i>                                                                                                                                                                              | Bioethics<br>Commission at<br>the Military<br>Institute of<br>Medicine                | Szaserów, Poland                              |
| Universitätsspital Zürich<br><br><i>(Site in Poland initiated but never recruited any patients)</i>                                                                                                                                                                               | Cantonal Ethics<br>Committee                                                          | Zürich, Switzerland                           |
| Sheba Medical Center                                                                                                                                                                                                                                                              | Sheba Medical<br>Center Helsinki<br>Committee                                         | Tel Hashomer,<br>Israel                       |
| Rabin Medical Center                                                                                                                                                                                                                                                              | Helsinki<br>Committee Rabin<br>MC                                                     | Petah-Tikva, Israel                           |

| <b>Participating centre</b>                          | <b>Ethics committee</b>                                                     | <b>Ethics committee town/city and country</b> |
|------------------------------------------------------|-----------------------------------------------------------------------------|-----------------------------------------------|
| Ramban Medical Center                                | Rambam Healthcare Campus Helsinki Committee                                 | Haifa, Israel                                 |
| Tel Aviv Sourasky Medical Center                     | Tel Aviv Sourasky Medical Center Helsinki Committee                         | Tel Aviv, Israel                              |
| Shaare-Zedek Medical Center                          | Shaare Zedek Medical Center Jerusalem Ethics (Helsinki) Committee           | Jerusalem, Israel                             |
| The University of Auckland                           | Maori Health Research                                                       | Auckland, New Zealand                         |
| Wellington Hospital                                  | Human Disability Research Ethics Committee                                  | Wellington, New Zealand                       |
| The Royal Melbourne Hospital<br>The Western Hospital | Melbourne Health Human Research Ethics Committee                            | Parkville, Australia                          |
| Royal North Shore Hospital                           | Northern Sydney Local Health District Human Research Ethics Committee       | Sydney, Australia                             |
| St George Hospital                                   | South Eastern Sydney Local Health District                                  | Kogarah, Australia                            |
| Nepean Cancer Care Centre                            | Nepean Blue Mountains Local Health District Human Research Ethics Committee | Penrith, Australia                            |
| St Vincent's Hospital                                | St Vincent's Hospital Sydney Human Research Ethics Committee                | Sydney, Australia                             |

| <b>Participating centre</b>                                | <b>Ethics committee</b>                                    | <b>Ethics committee town/city and country</b> |
|------------------------------------------------------------|------------------------------------------------------------|-----------------------------------------------|
| Sydney Adventist Hospital                                  | Adventist HealthCare Ltd Human Research Ethics Committee   | Wahroonga, Australia                          |
| Royal Hobart Hospital                                      | Human Research Ethics Committee (Tasmania) Network         | Hobart, Australia                             |
| Monash Medical Centre                                      | Monash Health Human Research Ethics Committees             | Melbourne, Australia                          |
| Peninsula and South Eastern Haematology and Oncology Group | Bellberry Limited                                          | Eastwood, Australia                           |
| Maroondah Hospital                                         | Eastern Health Office of Research and Ethics               | Box Hill, Australia                           |
| Wesley Medical Centre                                      | Unitingcare Queensland Human Research Ethics Committee     | Brisbane, Australia                           |
| Princess Alexandra Hospital                                | Metro South Health                                         | Woolloongabba, Australia                      |
| Royal Perth Hospital                                       | Royal Perth Hospital Human Research Ethics Committee       | Perth, Australia                              |
| Sir Charles Gairdner Hospital                              | Sir Charles Gairdner Group Human Research Ethics Committee | Perth, Australia                              |
| Hollywood Private Hospital                                 | Hollywood Private Hospital Research Ethics Committee       | Perth, Australia                              |
| St John of God Murdoch Hospital                            | St John of God Health Care Ethics Committee                | Perth, Australia                              |

| <b>Participating centre</b>          | <b>Ethics committee</b>                                                    | <b>Ethics committee town/city and country</b> |
|--------------------------------------|----------------------------------------------------------------------------|-----------------------------------------------|
| Mount Medical Centre                 | Mount Hospital Ethics Committee                                            | Perth, Australia                              |
| Royal Adelaide Hospital              | Royal Adelaide Hospital Research Ethics Committee                          | Adelaide, Australia                           |
| Queen Elizabeth II Hospital          | Queen Elizabeth Hospital Ethics                                            | Woodville South, Australia                    |
| Flinders Medical Centre              | Flinders Medical Centre Research Ethics                                    | Bedford Park, Australia                       |
| Altru Health System                  | Altru Health System Institutional Review Board                             | Grand Forks, USA                              |
| Froedtert Memorial Lutheran Hospital | Medical College of Wisconsin Froedtert Hospital Institutional Review Board | Milwaukee, USA                                |
| Aurora St Luke's Medical Center      | Aurora Institutional Review Board                                          | Milwaukee, USA                                |
| University of Louisville             | The University of Louisville Institutional Review Board                    | Louisville, USA                               |
| University of Maryland               | University of Maryland, Baltimore Institutional Review Board               | Baltimore, USA                                |
| Abbott Northwestern                  | Allina Hospitals & Clinics Institutional Review Board                      | Minneapolis, USA                              |

| <b>Participating centre</b>                                                                                                                                                                            | <b>Ethics committee</b>                                                                                     | <b>Ethics committee town/city and country</b> |
|--------------------------------------------------------------------------------------------------------------------------------------------------------------------------------------------------------|-------------------------------------------------------------------------------------------------------------|-----------------------------------------------|
| Florida International University<br>University of Washington<br>Holy Name Hospital<br>City of Hope<br>Pinnacle Oncology Hematology<br>Arizona Center for Cancer Care<br>University of Illinois Chicago | Western Institutional Review Board                                                                          | Puyallup, USA                                 |
| Montefiore Medical Center                                                                                                                                                                              | West Campus IRB (formerly Montefiore Medical Center Institutional Review Board)                             | Bronx, USA                                    |
| Carolinas Medical Center                                                                                                                                                                               | The Institutional Review Board of the Carolinas HealthCare System (pre-2012) and Chesapeake IRB (post 2012) | Charlotte and Columbia, USA [respectively]    |
| Adventist Midwest Health                                                                                                                                                                               | Adventist Midwest Health Institutional Review Board                                                         | La Grange, USA                                |
| Ingalls Memorial Hospital                                                                                                                                                                              | Ingalls Hospital Institutional Review Board                                                                 | Harvey, USA                                   |
| St Mark's Hospital                                                                                                                                                                                     | St Mark's Hospital Institutional Review Board                                                               | Salt Lake City, USA                           |
| William Beaumont Hospital                                                                                                                                                                              | William Beaumont Hospital Human Investigation Committee                                                     | Royal Oak, USA                                |

| <b>Participating centre</b>             | <b>Ethics committee</b>                             | <b>Ethics committee town/city and country</b> |
|-----------------------------------------|-----------------------------------------------------|-----------------------------------------------|
| West Suburban Medical Center            | Vanguard Health Chicago Institutional Review Board  | Oak Park, USA                                 |
| University of Pittsburgh Medical Center | University of Pittsburgh Institutional Review Board | Pittsburgh, USA                               |
